# Supplementary material for: Neighborhood structure-guided brain functional networks estimation for mild cognitive impairment identification
Source: PeerJ. 2024 Jul 30;12:e17774. doi: 10.7717/peerj.17774 (PMC11296305; doi:10.7717/peerj.17774)
Supplement: Supplemental Information 3 [file peerj-12-17774-s003.xlsx]

## Sheet: Sheet1
Translation	Original Text	File	Line Number
Define a bidirectional LSTM model	定义双向LSTM模型	BiLSTM.py	5
Define bidirectional LSTM layer	定义双向LSTM层	BiLSTM.py	12
Define fully connected layers	定义全连接层	BiLSTM.py	15
Multiplying by 2 is because it is a bidirectional LSTM	乘以2是因为这是一个双向LSTM	BiLSTM.py	16
Initialize LSTM hidden state	初始化LSTM隐藏状态	BiLSTM.py	20
forward propagation	前向传播	BiLSTM.py	24
Obtain the output of the last time step from the output of LSTM	从LSTM的输出中获取最后一个时间步的输出	BiLSTM.py	27
Fully connected layer	全连接层	BiLSTM.py	30
Define a simple RNN model	定义一个简单的RNN模型	BiGRU.py	5
Read table data named "metric"	读取名为"metric"的表格数据	m_s.py/util	4
You need to read table data according to your data format	你需要根据你的数据格式来读取表格数据	m_s.py/util	5
Calculate the mean of each column	计算每列的均值	m_s.py/util	7
Calculate the standard deviation for each column	计算每列的标准差	m_s.py/util	10
Print mean and standard deviation	打印均值和标准差	m_s.py/util	13
mean value	均值	m_s.py/util	14
standard deviation	标准差	m_s.py/util	16
Reading data from an Excel file	从Excel文件中读取数据	util.py/util	29
Dimension for obtaining data	获取数据的维度	util.py/util	32
Number of people in the data	数据中的人数	util.py/util	33
Number of features	特征数量	util.py/util	34
characteristic shape	特征形状	util.py/util	35
Calculate the accuracy of the classifier	计算分类器的准确率	util.py/util	104
Calculate the recall rate of the classifier	计算分类器的召回率	util.py/util	107
Calculate specificity	计算特异性	util.py/util	110
Calculate positive predictive values	计算正预测值	util.py/util	114
Calculate negative predictive value	计算负预测值	util.py/util	117
